1 **Full-length 16S rRNA gene amplicon analysis of human gut microbiota using**  
2 **MinION™ nanopore sequencing confers species-level resolution**

3

4 Yoshiyuki Matsuo<sup>1\*</sup>, Shinnosuke Komiya<sup>2,3</sup>, Yoshiaki Yasumizu<sup>4,5</sup>, Yuki Yasuoka<sup>5</sup>,  
5 Katsura Mizushima<sup>6</sup>, Tomohisa Takagi<sup>6</sup>, Kirill Kryukov<sup>7</sup>, Aisaku Fukuda<sup>8</sup>, Yoshiharu  
6 Morimoto<sup>2</sup>, Yuji Naito<sup>6</sup>, Hidetaka Okada<sup>3</sup>, Hidemasa Bono<sup>9,10</sup>, So Nakagawa<sup>7</sup> and  
7 Kiichi Hirota<sup>1</sup>

8

9 <sup>1</sup> Department of Human Stress Response Science, Institute of Biomedical Science,  
10 Kansai Medical University, Hirakata, Japan.

11 <sup>2</sup> HORAC Grand Front Osaka Clinic, Osaka, Japan.

12 <sup>3</sup> Obstetrics and Gynecology, Kansai Medical University Graduate School of Medicine,  
13 Hirakata, Japan.

14 <sup>4</sup> Department of Experimental Immunology, Immunology Frontier Research Center,  
15 Osaka University, Osaka, Japan.

16 <sup>5</sup> Faculty of Medicine, Osaka University, Osaka, Japan.

17 <sup>6</sup> Molecular Gastroenterology and Hepatology, Kyoto Prefectural University of  
18 Medicine, Kyoto, Japan.

19 <sup>7</sup> Department of Molecular Life Science, Tokai University School of Medicine, Isehara,  
20 Japan.

21 <sup>8</sup> IVF Osaka Clinic, Osaka, Japan.

22 <sup>9</sup> Database Center for Life Science (DBCLS), Research Organization of Information and  
23 Systems, Mishima, Japan.

24 <sup>10</sup> Program of Biomedical Science, Graduate School of Integrated Sciences for Life,  
25 Hiroshima University, Higashi-Hiroshima, Japan.

26

27 \* Correspondence:

28 Yoshiyuki Matsuo

29 ysmatsuo-kyt@umin.ac.jp

30 <sup>1</sup>Department of Human Stress Response Science, Institute of Biomedical Science,

31 Kansai Medical University, 2-5-1 Shin-machi, Hirakata, Osaka 573-1010, Japan.

32

33 **Abstract**

34 Species-level genetic characterization of complex bacterial communities has important  
35 clinical applications. In the present study, we assessed the performance of full-length  
36 16S rRNA gene analysis of human gut microbiota using the nanopore long-read  
37 sequencer MinION™. A new strategy for library construction with an optimized primer  
38 set overcame PCR-associated bias and produced accurate taxonomic classifications of a  
39 broad range of bacterial species. Our present microbiome study, comparing the  
40 discriminatory power of full-length and short-read sequencing, clearly illustrated the  
41 analytical advantage of sequencing the full-length 16S rRNA gene, which provided  
42 higher species-level resolution and accuracy.

43

44 **Keywords:**

45 16S rRNA, gut microbiota, metagenome, MinION™, nanopore sequencing

46

## 47 **Background**

48 Recent advances in DNA sequencing technology have had a revolutionary impact on  
49 clinical microbiology [1]. Next-generation sequencing (NGS) technology enables  
50 parallel sequencing of DNA on a massive scale to generate vast quantities of accurate  
51 data. NGS platforms are now increasingly used in the field of clinical research [2].  
52 Metagenomic sequencing offers numerous advantages over traditional culture-based  
53 techniques that have long been the standard test for detecting pathogenic bacteria. This  
54 method is particularly useful for characterizing uncultivable bacteria and novel  
55 pathogens [3].  
56 Among the metagenomic sequencing strategies, amplicon sequencing of the 16S  
57 ribosomal RNA (rRNA) gene has proven to be a reliable and efficient option for  
58 taxonomic classification [4, 5]. The bacterial 16S rRNA gene contains nine variable  
59 regions (V1 to V9) that are separated by highly conserved sequences across different  
60 taxa. For bacterial identification, the 16S rRNA gene is first amplified by polymerase  
61 chain reaction (PCR) with primers annealing to conserved regions and then sequenced.  
62 The sequencing data are subjected to bioinformatic analysis in which the variable  
63 regions are used to discriminate between bacterial taxa [6].  
64 Since the conventional parallel-type short-read sequencer cannot yield reads covering  
65 the full length of the 16S rRNA gene [7], several regions of it have been targeted for  
66 sequencing, which often causes ambiguity in taxonomic classification [8]. New  
67 sequencing platforms have overcome these technical restrictions, particularly those  
68 affecting read length. A prime example is the MinION™ sequencer from Oxford  
69 Nanopore Technologies, which is capable of producing long sequences with no  
70 theoretical read length limit [9-11]. MinION™ sequencing targets the entire 16S rRNA  
71 gene, allowing the identification of bacteria with more accuracy and sensitivity [12, 13].  
72 Furthermore, MinION™ produces sequencing data in real time, which reduces  
73 turnaround time for data processing [14, 15].

74 Given these features of MinION™ sequencing, we had previously conducted full-length  
75 16S amplicon sequencing analyses using the MinION™ platform coupled to a  
76 bioinformatics pipeline, which allowed us to identify bacterial pathogens with a total  
77 analysis time of under two hours [16]. However, we also found that the approach of  
78 using the commercial 16S Barcoding Kit (SQK-RAB204) available from Oxford  
79 Nanopore Technologies has a limited ability to detect particular taxa such as  
80 *Bifidobacterium* [16]. This is probably due to sequence mismatches in the primer used  
81 for 16S gene amplification [17]. *Bifidobacterium* play an essential role in maintaining  
82 gut homeostasis, and deviations or aberrancies in the *Bifidobacterium* composition have  
83 been closely associated with human diseases including obesity, allergy, and  
84 inflammatory disorders [18]. Based on their health-promoting effects, several strains of  
85 *Bifidobacterium* have been utilized as probiotics [19]. Within these contexts, the  
86 species-level characterization of *Bifidobacterium* diversity in human gut microbiota is  
87 very important in clinical practice.

88 Our metagenomic sequencing approach using MinION™ has been tested only with pre-  
89 characterized mock bacterial DNA and a limited number of pathogenic bacteria from a  
90 patient-derived sample [20]. Its applicability to highly complex bacterial communities  
91 has not yet been thoroughly investigated. Therefore, in this study we modified our  
92 existing protocol for 16S amplicon sequencing by MinION™ and applied it to human  
93 gut microbiota with a complex bacterial composition [21], including *Bifidobacterium*, to  
94 determine whether full-length 16S rRNA gene sequencing with MinION™ is an  
95 effective characterization tool.

96

97 **Methods**

98 **Mock bacterial community DNA**

99 A mixture of bacterial DNA (10 Strain Even Mix Genomic Material, MSA-1000) was  
100 obtained from the American Type Culture Collection (ATCC, Manassas, VA, USA),  
101 comprising genomic DNA prepared from the following ten bacterial strains: *Bacillus*  
102 *cereus* (ATCC 10987), *Bifidobacterium adolescentis* (ATCC 15703), *Clostridium*  
103 *beijerinckii* (ATCC 35702), *Deinococcus radiodurans* (ATCC BAA-816), *Enterococcus*  
104 *faecalis* (ATCC 47077), *Escherichia coli* (ATCC 700926), *Lactobacillus gasseri* (ATCC  
105 33323), *Rhodobacter sphaeroides* (ATCC 17029), *Staphylococcus epidermidis* (ATCC  
106 12228), and *Streptococcus mutans* (ATCC 700610).

107

108 **Fecal DNA**

109 DNA was extracted from six human fecal samples using the NucleoSpin® Microbial  
110 DNA Kit (Macherey-Nagel, Düren, Germany), as described previously [22]. Briefly,  
111 human feces stored using the Feces Collection Kit (Techno Suruga Lab, Shizuoka,  
112 Japan) were subjected to mechanical disruption by bead-beating, and DNA was isolated  
113 using silica membrane spin columns. Extracted DNA was purified with the Agencourt  
114 AMPure® XP (Beckman Coulter, Brea, CA, USA).

115

116 **Metagenomic sequencing on the MinION™ platform**

117 Four-primer PCR with rapid adapter attachment chemistry generated 16S gene  
118 amplicons with modified 5' ends for simplified post-PCR adapter attachment following  
119 the manufacturer's instructions with slight modifications. For amplification of the V1-  
120 V9 region of the 16S rRNA gene, the following inner primers were used, with 16S  
121 rRNA gene-specific sequences underlined: forward primer (S-D-Bact-0008-c-S-20 [23])  
122 with anchor sequence 5'-  
123 TTTCTGTTGGTGCTGATATTGCAGRGTTYGATYMTGGCTCAG-3' and reverse

124 primer (1492R) with anchor sequence 5'-  
125 ACTTGCCTGTCGCTCTATCTTCCGGYTACCTTGTTACGACTT-3'. For  
126 amplification of the V3-V4 region, the following inner primers were used, with 16S  
127 rRNA gene-specific sequences underlined: 341F with anchor sequence 5'-  
128 TTTCTGTTGGTGCTGATATTGCCCTACGGGNGGCWGCAG-3' and 806R with  
129 anchor sequence 5'-  
130 ACTTGCCTGTCGCTCTATCTTCCGGACTACHVGGGTWTCTAAT-3'. PCR  
131 amplification of 16S rRNA genes was conducted using the KAPA2G™ Robust HotStart  
132 ReadyMix PCR Kit (Kapa Biosystems, Wilmington, MA, USA) in a total volume of 25  
133 µl containing inner primer pairs (50 nM each) and the barcoded outer primer mixture  
134 (3%) from the PCR Barcoding Kit (SQK-PBK004; Oxford Nanopore Technologies,  
135 Oxford, UK). Amplification was performed with the following PCR conditions: initial  
136 denaturation at 95 °C for 3 min, 5 cycles of 95 °C for 15 sec, 55 °C for 15 sec, and  
137 72 °C for 30 sec, 30 cycles of 95 °C for 15 sec, 62 °C for 15 sec, and 72 °C for 30 sec,  
138 followed by a final extension at 72 °C for 1 min. Amplified DNA was purified using  
139 AMPure® XP (Beckman Coulter) and quantified by a NanoDrop® 1000 (Thermo  
140 Fischer Scientific, Waltham, MA, USA). A total of 100 ng of DNA was incubated with  
141 1 µl of Rapid Adapter at room temperature for 5 min. The prepared DNA library (11 µl)  
142 was mixed with 34 µl of Sequencing Buffer, 25.5 µl of Loading Beads, and 4.5 µl of  
143 water, loaded onto the R9.4 flow cell (FLO-MIN106; Oxford Nanopore Technologies),  
144 and sequenced on the MinION™ Mk1B. MINKNOW software ver. 1.11.5 (Oxford  
145 Nanopore Technologies) was used for data acquisition.

146

#### 147 **Metagenomic sequencing on the MiSeq™ platform**

148 Sequencing libraries were constructed as described previously [22]. Briefly, the V3-V4  
149 regions of the 16S rRNA gene were amplified using a 16S (V3–V4) Metagenomic  
150 Library Construction Kit for NGS (Takara Bio Inc, Kusatsu, Japan). The following

151 primers were used (16S rRNA gene-specific sequences are underlined): 341F with  
152 overhang adapter 5'-  
153 TCGTCGGCAGCGTCAGATGTGTATAAGAGACAGCCTACGGGNGGCWGCAG-  
154 3' and 806R with overhang adapter 5'-  
155 GTCTCGTGGGCTCGGAGATGTGTATAAGAGACAGGGACTACHVGGGTWTCT  
156 AAT-3'. The second PCR was performed using the Nextera® XT Index Kit (Illumina,  
157 San Diego, CA, USA) for sample multiplexing with index adapters. The libraries were  
158 sequenced on the MiSeq™ platform using the MiSeq™ Reagent Kit v3 (2 × 250 bp;  
159 Illumina).

160

### 161 **Bioinformatics analysis**

162 Albacore software ver. 2.3.4 (Oxford Nanopore Technologies) was used for basecalling  
163 the MinION™ sequencing data (FAST5 files) to generate pass reads (FASTQ format)  
164 with a mean quality score > 7. The adapter and barcode sequences were trimmed using  
165 the EPI2ME Fastq Barcoding workflow ver. 3.10.4 (Oxford Nanopore Technologies).  
166 The reads were filtered by size using SeqKit software ver. 0.10.0 [24], retaining 1300-  
167 1950 bp sequences for the V1-V9 region and 350-600 bp sequences for the V3-V4  
168 region, based on the size distribution of 16S rRNA gene sequences in the SILVA  
169 database ver. 132 [25, 26]. The processed reads from each set were analyzed using our  
170 bioinformatics pipeline [27], as described previously [14, 15]. Briefly, FASTQ files  
171 were converted to FASTA files. Simple repetitive sequences were masked using the  
172 TANTAN program ver. 18 with default parameters [28]. To remove reads derived from  
173 human DNA, we searched each read against the human genome (GRCh38) using  
174 minimap2 ver. 2.14 with a map-ont-option [29]. Then, unmatched reads were regarded  
175 as reads derived from bacteria. For each read, a minimap2 search with 5850  
176 representative bacterial genome sequences stored in the GenomeSync database  
177 (Additional File 1) [30] was performed. For each read, we kept the alignment with the



178 highest minimap2 score, and taxa were determined based on the NCBI taxonomy  
179 database [31]. Low-abundance taxa with less than 0.01% of total reads were discarded  
180 from the analysis.

181

## 182 **Statistical analyses**

183 Differences between groups were evaluated by one-way analysis of variance (ANOVA)  
184 followed by Dunnett's test for multiple comparisons. The Pearson correlation  
185 coefficient was computed to compare the bacterial compositions analyzed by different  
186 sequencing methods. Statistical significance was defined by a  $P$ -value  $< 0.05$ . Statistical  
187 analyses were performed with Prism8 (GraphPad Software, Inc. La Jolla, CA, USA).

188

## 189 **Statement of ethics**

190 The Sunkaky Institutional Review Board approved this study (No. 2017-27). All  
191 participants provided written informed consent.

192

## 193 **Results**

### 194 **Classification of the mock bacterial community**

195 The 16S rRNA gene sequence of *Bifidobacterium* has three base mismatches with the  
196 27F forward primer provided in the commercial sequencing kit (16S Barcoding Kit,  
197 SQK-RAB204, Oxford Nanopore Technologies; Additional File 2: Supplementary Fig.  
198 S1a), which biases amplification toward underrepresentation of *Bifidobacterium* species  
199 (Additional File 2: Supplementary Fig S2, Additional File 3: Supplementary Table S1-  
200 S3). To overcome this drawback, we introduced three degenerate bases to the 16S rRNA  
201 gene-specific sequences of the primer (Additional File 2: Supplementary Fig. S1b). The  
202 competence of the modified primer set was then evaluated by metagenomic analysis of  
203 a ten-species mock community. The V1-V9 region of the 16S rRNA gene was amplified  
204 by the four-primer PCR method with the rapid adapter attachment chemistry and  
205 sequenced (Fig. 1a). MinION™ sequencing generated 8651 pass reads (Table 1).  
206 Following adapter trimming and size selection, 6972 reads (80.6% of pass reads with an  
207 average lead length of 1473 bp) were retained for bacterial identification. Full-length  
208 16S amplicon sequencing with the modified primer set led to the successful  
209 identification of all the ten bacterial species, including *Bifidobacterium adolescentis*  
210 (Fig. 1b, 1c, Additional File 3: Supplementary Table S4). At the species level, 97.2% of  
211 analyzed reads were correctly assigned to each bacterial taxon included in the mock  
212 community, demonstrating the excellent discriminatory power of this full-length  
213 sequencing method for species identification (Fig. 1c).

214 We compared the resolution of full-length and short-read 16S amplicon sequencing for  
215 the taxonomic classification of bacteria. The V3-V4 region was amplified by four-  
216 primer PCR from the ten-species mock community DNA, and the samples were  
217 sequenced on MinION™. After removing the adapter/barcode sequences and filtering  
218 reads by length, 96189 reads with an average length of 454.9 bp for downstream  
219 analysis were yielded (Table 1). In contrast to full-length sequencing with the highest

220 resolution, a significant number of V3-V4 reads could not be classified down to the  
221 genus level, but could only be assigned to a higher taxonomic rank (Fig. 1b, 1c). Most  
222 reads derived from *Enterococcus faecalis* and *Escherichia coli* were not assigned down  
223 to each taxon, as more than two species produced the same similarity score for the V3-  
224 V4 sequence read queries. Such reads were classified to the parent taxon, as more  
225 specific classification was impossible (Additional File 3: Supplementary Table S5). The  
226 classifications were not affected by increasing the number of analyzed reads to 10000  
227 (Additional File 2: Supplementary Fig. S3, Additional File 3: Supplementary Table S6).  
228 For nine of the ten bacterial strains constituting the mock community, each subset of  
229 V1-V9 sequencing reads classified to the specific genus were assigned with almost  
230 complete accuracy (98.2-100%) to the corresponding species (Fig. 2). V3-V4 short-read  
231 sequencing showed a discriminatory power comparable to that of V1-V9 full-length  
232 sequencing in the classification of four genera (*Bacillus*, *Deinococcus*, *Rhodobacter*,  
233 and *Streptococcus*) with more than 98% of reads correctly assigned. However, the V3-  
234 V4 region was not suitable for species-level identification of other taxa, such as  
235 *Clostridium* and *Staphylococcus*. Only 0.2% of the V3-V4 reads belonging to the genus  
236 *Clostridium* were assigned to *Clostridium beijerinckii*, a component of the mock  
237 community. In contrast, 92.3% of *Clostridium* reads obtained from V1-V9 full-length  
238 sequencing were correctly classified at the species level. These results suggest a lower  
239 resolution of the V3-V4 region for species-level classification, emphasizing the  
240 advantage of long-read sequencing for obtaining an accurate representation of the  
241 sample bacterial composition.

242

### 243 **Classification of human fecal bacteria**

244 We assessed the performance of our full-length 16S amplicon sequencing approach in  
245 the context of a highly complex bacterial community. The V1-V9 region was amplified  
246 by four-primer PCR from six human fecal samples (F1-F6) and analyzed by MinION™

247 sequencing. (Table 2). In Fig. 3, the numbers of species detected are plotted against the  
248 numbers of reads analyzed. The curve started to plateau at around 20000 reads. There  
249 was a highly significant correlation between the read numbers 20000 and 30000  
250 (Pearson's correlation coefficient  $r > 0.999$ , Additional File 4: Supplementary Table S7).  
251 Based on these observations, randomly sampled 20000 reads were used in further  
252 analysis to determine the bacterial composition of the human gut.  
253 For comparison, amplicon sequencing of the V3-V4 region was also conducted using  
254 the MinION™ (Table 2) and the Illumina MiSeq™ platform (Table 3). The processed  
255 reads from each data set were allocated to the reference bacterial genome using our  
256 bioinformatics pipeline to determine the bacterial compositions (Additional File 5 for  
257 V1-V9 MinION™ sequencing, Additional File 6 for V3-V4 MinION™ sequencing, and  
258 Additional File 7 for V3-V4 MiSeq™ sequencing). From MiSeq™ sequencing data, the  
259 bacterial composition was also analyzed by the operational taxonomic unit (OTU)-  
260 based approach using the QIIME 2 (ver. 2019.7) pipeline (Additional File 2:  
261 Supplementary Fig. S4, Additional File 8) [32, 33]. Although *Bacteroides* was  
262 underrepresented in the OTU-based analysis, the two analytical methods (our  
263 bioinformatics pipeline and OTU-based method) produced similar taxonomic profiles in  
264 the dominant phylotypes for the MiSeq™ data. This result confirmed the validity of our  
265 method for the taxonomic classification of the bacterial community.  
266 The three sequencing methods (V1-V9 MinION™ sequencing, V3-V4 MinION™  
267 sequencing, and V3-V4 MiSeq™ sequencing) revealed similar profiles for the six fecal  
268 samples at the genus level (Fig. 4). Statistically significant similarities have been found  
269 in the relative genus abundances across these sequencing methods. Thus, at the genus  
270 level, V1-V9 full-length MinION™ sequencing exhibited a discriminatory power  
271 comparable to that of high-quality short-read sequencing with MiSeq™ technology.  
272  
273 **The species-level taxonomic resolution achieved by full-length sequencing of the**

274 **16S rRNA gene using MinION™**

275 While genus classification using long versus short reads was relatively comparable, we  
276 observed considerable differences across amplified regions in the species-level profiling  
277 of human gut microbiota. As shown in Fig. 5, the number of ambiguous reads that were  
278 not assigned to species but could be classified at a higher level was significantly greater  
279 in the V3-V4 data set in comparison than in the V1-V9 data set.

280 When species compositions of the dominant taxa (*Bifidobacterium*, *Blautia*, and  
281 *Bacteroides*) were analyzed, the V1-V9 and V3-V4 sequencing produced comparable  
282 results for *Blautia* (Additional File 2: Supplementary Fig. S5, Additional File 4:  
283 Supplementary Table S8) and *Bacteroides* genus (Additional File 2: Supplementary Fig.  
284 S6, Additional File 4: Supplementary Table S9) in most of the fecal samples. For  
285 *Bifidobacterium*, there appeared to be considerable deviations in the relative abundances  
286 of some species depending on the sequencing method used (Fig. 6, Additional File 4:  
287 Supplementary Table S10). Notably, most of the *Bifidobacterium* reads generated by  
288 V1-V9 MinION™ sequencing were classified into the *Bifidobacterium* species that  
289 were isolated from human sources [18, 34]. A significant number of the V3-V4 reads,  
290 however, were assigned to *Bifidobacterium* species of non-human origin (Additional  
291 File 2: Supplementary Fig. S7). From V3-V4 MiSeq™ sequencing data, the OTU-based  
292 classification analysis using the QIIME 2 pipeline also revealed a lower resolution of  
293 short-read sequencing for taxonomic separation of *Bifidobacterium* genus. Except for  
294 *Bifidobacterium longum*, *Bifidobacterium* species could not be reliably identified by the  
295 V3-V4 sequencing strategy (Additional File 2: Supplementary Fig. S8). These results  
296 suggest that species classification of *Bifidobacterium* based on V3-V4 sequencing can  
297 potentially lead to misidentification and biased community profiling that lacks  
298 biological significance.

299

## 300 **Discussion**

301 16S rRNA amplicon sequencing is a powerful strategy for taxonomic classification of  
302 bacteria and has been extensively employed for analyzing metagenomic samples from  
303 environmental and clinical sources [5, 35, 36]. We assessed the performance of  
304 MinION™ sequencing by comparing the resolution of the V1-V9 and V3-V4 reads for  
305 the taxonomic classification of bacteria. Long-read MinION™ sequencing with the  
306 optimized primer set successfully identified *Bifidobacterium* species leading to a better  
307 representation of the species composition of the mock community. For improving the  
308 classification results, the reads were filtered by length to eliminate those outside the  
309 expected size range. Typically, extremely short reads possess only one primer-binding  
310 site, suggesting that they are derived from incomplete sequencing. There also exist  
311 unexpectedly longer reads with a continuous sequence structure in which two 16S  
312 amplicons are linked end-to-end. Because these reads can potentially result in  
313 unclassified reads or misclassification, they were eliminated before alignment to the  
314 reference sequences of the bacterial genome.

315 We also modified library construction for MinION™ sequencing with a four-primer  
316 PCR strategy, which enabled ligase-free adapter attachment to occur in a single-step  
317 reaction. The four-primer PCR generates amplicons with particular chemical  
318 modifications at the 5' ends to which adapter molecules can be attached non-  
319 enzymatically. Unlike the ligation-based approach, the PCR products amplified by the  
320 four-primer method are subjected directly to the adapter attachment reaction without  
321 repairing their 5' ends, substantially reducing the time required for sample preparation.  
322 Furthermore, because the protocol is free of Nanopore's transposase-based technology  
323 (e.g. Rapid Sequencing Kit, SQK-RAD004) that cleaves DNA molecules to produce  
324 chemically modified ends for library construction, the PCR products are kept intact,  
325 enabling sequencing of the entire amplified region. Thus, the four-primer PCR-based  
326 method allowed us to perform amplicon sequencing on the MinION™ platform with

327 user-defined arbitrary primer pairs, taking advantage of the rapid adapter attachment  
328 chemistry. This method can be applied to a wide range of sequence-based analyses,  
329 including detection of functional genetic markers like antimicrobial resistance genes  
330 and identification of genetic variations in targeted loci [11, 37, 38].

331 Our present microbiome study, comparing the discriminatory power of the V1-V9 and  
332 V3-V4 reads sequenced on the MinION™ platform, clearly illustrated the advantage of  
333 sequencing the entire 16S rRNA gene. The full-length 16S gene sequencing provided  
334 better resolution than short-read sequencing for discriminating between members of  
335 certain bacterial taxa, including *Clostridium*, *Enterococcus*, *Escherichia*, and  
336 *Staphylococcus*. Consistently, comprehensive *in silico* experiments using sequencing a  
337 sequencing data set consisting of different regions of the 16S rRNA gene have shown  
338 that the choice of the regions to be sequenced substantially affects the classification  
339 results [6, 39]. As shown here and in previous publications, short-read sequencing of the  
340 16S rRNA gene may be a reasonable option for providing a rough estimation of  
341 bacterial diversity. However, it was not suited for analysis requiring species-level  
342 resolution and accuracy, which was afforded by sequencing the entire 16S rRNA gene.

343 In metagenomic analysis of the human fecal samples, we used the taxonomic resolution  
344 of the V3-V4 region sequenced with MiSeq™, which generates highly accurate reads,  
345 as a benchmark for the taxonomic resolution of the full-length 16S gene sequenced with  
346 MinION™. The relative abundance of dominant bacterial taxa was highly similar at the  
347 genus level between full-length MinION™ and short-read MiSeq™ sequencing.

348 Despite the lower read quality, the full-length sequencing by MinION™ enabled  
349 reliable identification of bacterial genera with an accuracy comparable to MiSeq™  
350 technology.

351 At the species level, MinION™ long-read sequencing had better resolution for accurate  
352 identification of the composition of human gut microbiota. Composition profiles of  
353 *Bifidobacterium*, one of the dominant genera present in the human gut [40], appeared to

354 differ considerably between the two sequencing platforms. While most MinION™ V1-  
355 V9 reads were assigned to *Bifidobacterium* species of human origin, a significant  
356 number of the MiSeq™ V3-V4 reads were assigned to non-human *Bifidobacterium*  
357 species [34]. Such improbable errors in species classification may be attributed to the  
358 lower resolution provided by the V3-V4 region, but in fact, metagenomic analysis of  
359 mouse gut microbiota has revealed that V3-V4 reads sequenced on MiSeq™ are not  
360 well-suited for classifying *Bifidobacterium* species, consistent with our findings [41].

361

## 362 **Conclusions**

363 Our modified protocol for 16S amplicon sequencing overcame known limitations, such  
364 as the primer-associated bias toward the underrepresentation of *Bifidobacterium*, and  
365 enabled taxonomic classification across a broad range of bacterial species.

366 Benchmarking with MiSeq™ sequencing technology demonstrated the analytical  
367 advantage of sequencing the full-length 16S gene with MinION™, which provided the  
368 requisite species-level resolution and accuracy. With the recent progress in nanopore  
369 sequencing chemistry and base-calling algorithms, sequencing accuracy is continuously  
370 improving [42, 43]. This will soon enable us to exploit the full potential of MinION™  
371 long-read sequencing technology. High-quality long sequences will allow better  
372 discrimination between closely related species, and even bacterial strains, in  
373 metagenomic analyses.

374



375 **Abbreviations**

376 NGS: next-generation sequencing; OTU: operational taxonomic unit; PCR: polymerase  
377 chain reaction; rRNA: ribosomal RNA

378

379 **Additional files**

380 **Additional File 1:** Representative bacterial genomes stored in the GenomeSync  
381 database.

382 **Additional File 2: Fig. S1.** Sequence heterogeneities of the 27F primer-annealing site  
383 in 16S rRNA genes. **Fig. S2.** Evaluation of 16S rRNA PCR primers for identification of  
384 bacterial species. **Fig. S3.** Effect of read number on taxonomic classification. **Fig. S4.**  
385 Rarefaction curves of observed OTUs in 16S V3-V4 amplicon sequencing of human  
386 fecal samples using the MiSeq™ platform. **Fig. S5.** Species composition of *Blautia* in  
387 human fecal samples. **Fig. S6.** Species composition of *Bacteroides* in human fecal  
388 samples. **Fig. S7.** Deviations in the relative abundances of *Bifidobacterium* species in  
389 human fecal samples. **Fig. S8.** Comparison of species composition of fecal  
390 *Bifidobacterium* between classification methods.

391 **Additional File 3: Tables S1-S6.** Taxonomic assignment of the mock community  
392 analyzed by MinION™ sequencing.

393 **Additional File 4: Table S7.** Correlations between numbers of reads and numbers of  
394 detected species in metagenomic sequencing of human fecal samples. **Table S8.**  
395 Comparison of species composition of fecal *Blautia* between sequencing methods.  
396 **Table S9.** Comparison of species composition of fecal *Bacteroides* between sequencing  
397 methods. **Table S10.** Comparison of species composition of fecal *Bifidobacterium*  
398 between sequencing methods.

399 **Additional File 5:** Taxonomic profile of human fecal samples from MinION™  
400 sequencing (amplicons: V1-V9).

401 **Additional File 6:** Taxonomic profile of human fecal samples from MinION™

402 sequencing (amplicons: V3-V4).

403 **Additional File 7:** Taxonomic profile of human fecal samples from MiSeq™

404 sequencing (amplicons: V3-V4).

405 **Additional File 8:** Taxonomic profiles of human fecal samples from MiSeq™

406 sequencing (amplicons: V3-V4, taxonomic classification by OTU-based analysis using  
407 the QIIME 2 pipeline).

408

#### 409 **Declarations**

#### 410 **Ethics approval and consent to participate**

411 This study was approved by the Sunkaky Institutional Review Board (No. 2017-27).

412

#### 413 **Consent for publication**

414 All participants provided written informed consent.

415

#### 416 **Availability of data and materials**

417 The sequence datasets supporting the conclusions of this article are available in the  
418 DDBJ DRA database (<https://www.ddbj.nig.ac.jp/dra/index-e.html>) under accession  
419 numbers DRR225043 to DRR225065.

420

#### 421 **Competing interests**

422 The authors declare that they have no competing interests.

423

#### 424 **Funding**

425 This work was supported by Japan Society for the Promotion of Science KAKENHI  
426 Grant Number JP19K09339 to YMa and the branding program as a world-leading  
427 research university on intractable immune and allergic diseases supported by the  
428 Ministry of Education, Culture, Sports, Science and Technology of Japan.

429

430 **Authors' contributions**

431 YMa, KK, AF, YMo, YN, SN and KH designed and supervised the study. SK, AF, YMo,  
432 and HO contributed to sample collection. YMa, KM, and TT conducted the  
433 experiments. YMa, YYasumizu, YYasuoka, and SN analyzed the data. YMa wrote the  
434 manuscript. YYasumizu, HB, SN, and KH contributed to editing the manuscript. All  
435 authors read and approved the final manuscript.

436

437 **Acknowledgements**

438 We are grateful to Tadashi Imanishi (Tokai University School of Medicine) and Shino  
439 Matsukawa (Kyoto University Hospital) for helpful comments and discussion. We  
440 would like to thank Editage ([www.editage.com](http://www.editage.com)) for English language editing.

441

442 **References**

- 443 1. Chiu CY, Miller SA. Clinical metagenomics. *Nat Rev Genet.* 2019;20(6):341-  
444 55.
- 445 2. Loman NJ, Misra RV, Dallman TJ, Constantinidou C, Gharbia SE, Wain J, et al.  
446 Performance comparison of benchtop high-throughput sequencing platforms.  
447 *Nat Biotechnol.* 2012;30(5):434-9.
- 448 3. Didelot X, Bowden R, Wilson DJ, Peto TEA, Crook DW. Transforming clinical  
449 microbiology with bacterial genome sequencing. *Nat Rev Genet.*  
450 2012;13(9):601-12.
- 451 4. Clarridge JE, 3rd. Impact of 16S rRNA gene sequence analysis for identification  
452 of bacteria on clinical microbiology and infectious diseases. *Clin Microbiol Rev.*  
453 2004;17(4):840-62, table of contents.
- 454 5. Langille MG, Zaneveld J, Caporaso JG, McDonald D, Knights D, Reyes JA, et  
455 al. Predictive functional profiling of microbial communities using 16S rRNA  
456 marker gene sequences. *Nat Biotechnol.* 2013;31(9):814-21.
- 457 6. Johnson JS, Spakowicz DJ, Hong BY, Petersen LM, Demkowicz P, Chen L, et  
458 al. Evaluation of 16S rRNA gene sequencing for species and strain-level  
459 microbiome analysis. *Nat Commun.* 2019;10(1):5029.
- 460 7. Ravi RK, Walton K, Khosroheidari M. MiSeq: A Next Generation Sequencing  
461 Platform for Genomic Analysis. *Methods Mol Biol.* 2018;1706:223-32.
- 462 8. Kuczynski J, Lauber CL, Walters WA, Parfrey LW, Clemente JC, Gevers D, et  
463 al. Experimental and analytical tools for studying the human microbiome. *Nat*  
464 *Rev Genet.* 2011;13(1):47-58.
- 465 9. Leggett RM, Clark MD. A world of opportunities with nanopore sequencing. *J*  
466 *Exp Bot.* 2017;68(20):5419-29.
- 467 10. Quick J, Ashton P, Calus S, Chatt C, Gossain S, Hawker J, et al. Rapid draft  
468 sequencing and real-time nanopore sequencing in a hospital outbreak of

- 469 Salmonella. *Genome Biol.* 2015;16:114.
- 470 11. Leggett RM, Alcon-Giner C, Heavens D, Caim S, Brook TC, Kujawska M, et al.  
471 Rapid MinION profiling of preterm microbiota and antimicrobial-resistant  
472 pathogens. *Nat Microbiol.* 2020;5(3):430-42.
- 473 12. Benitez-Paez A, Sanz Y. Multi-locus and long amplicon sequencing approach to  
474 study microbial diversity at species level using the MinION portable nanopore  
475 sequencer. *Gigascience.* 2017;6(7):1-12.
- 476 13. Shin H, Lee E, Shin J, Ko SR, Oh HS, Ahn CY, et al. Elucidation of the bacterial  
477 communities associated with the harmful microalgae *Alexandrium tamarense*  
478 and *Cochlodinium polykrikoides* using nanopore sequencing. *Sci Rep.*  
479 2018;8(1):5323.
- 480 14. Mitsunashi S, Kryukov K, Nakagawa S, Takeuchi JS, Shiraishi Y, Asano K, et  
481 al. A portable system for rapid bacterial composition analysis using a nanopore-  
482 based sequencer and laptop computer. *Sci Rep.* 2017;7(1):5657.
- 483 15. Nakagawa S, Inoue S, Kryukov K, Yamagishi J, Ohno A, Hayashida K, et al.  
484 Rapid sequencing-based diagnosis of infectious bacterial species from  
485 meningitis patients in Zambia. *Clin Transl Immunology.* 2019;8(11):e01087.
- 486 16. Kai S, Matsuo Y, Nakagawa S, Kryukov K, Matsukawa S, Tanaka H, et al.  
487 Rapid bacterial identification by direct PCR amplification of 16S rRNA genes  
488 using the MinION nanopore sequencer. *FEBS Open Bio.* 2019;9(3):548-57.
- 489 17. Kim SW, Suda W, Kim S, Oshima K, Fukuda S, Ohno H, et al. Robustness of  
490 gut microbiota of healthy adults in response to probiotic intervention revealed by  
491 high-throughput pyrosequencing. *DNA Res.* 2013;20(3):241-53.
- 492 18. Arbolea S, Watkins C, Stanton C, Ross RP. Gut Bifidobacteria Populations in  
493 Human Health and Aging. *Front Microbiol.* 2016;7:1204.
- 494 19. Backhed F, Ley RE, Sonnenburg JL, Peterson DA, Gordon JI. Host-bacterial  
495 mutualism in the human intestine. *Science.* 2005;307(5717):1915-20.

- 496 20. Tanaka H, Matsuo Y, Nakagawa S, Nishi K, Okamoto A, Kai S, et al. Real-time  
497 diagnostic analysis of MinION-based metagenomic sequencing in clinical  
498 microbiology evaluation: a case report. *JA Clin Rep*. 2019;5(1):24.
- 499 21. Arumugam M, Raes J, Pelletier E, Le Paslier D, Yamada T, Mende DR, et al.  
500 Enterotypes of the human gut microbiome. *Nature*. 2011;473(7346):174-80.
- 501 22. Takagi T, Naito Y, Inoue R, Kashiwagi S, Uchiyama K, Mizushima K, et al.  
502 Differences in gut microbiota associated with age, sex, and stool consistency in  
503 healthy Japanese subjects. *J Gastroenterol*. 2019;54(1):53-63.
- 504 23. Klindworth A, Pruesse E, Schweer T, Peplies J, Quast C, Horn M, et al.  
505 Evaluation of general 16S ribosomal RNA gene PCR primers for classical and  
506 next-generation sequencing-based diversity studies. *Nucleic Acids Res*.  
507 2013;41(1):e1.
- 508 24. Shen W, Le S, Li Y, Hu F. SeqKit: A Cross-Platform and Ultrafast Toolkit for  
509 FASTA/Q File Manipulation. *PLoS One*. 2016;11(10):e0163962.
- 510 25. Quast C, Pruesse E, Yilmaz P, Gerken J, Schweer T, Yarza P, et al. The SILVA  
511 ribosomal RNA gene database project: improved data processing and web-based  
512 tools. *Nucleic Acids Res*. 2013;41(Database issue):D590-6.
- 513 26. Silva reference files. [https://mothur.org/wiki/silva\\_reference\\_files/](https://mothur.org/wiki/silva_reference_files/)
- 514 27. Genome Search Toolkit. <http://kirill-kryukov.com/study/tools/gstk/>
- 515 28. Frith MC. A new repeat-masking method enables specific detection of  
516 homologous sequences. *Nucleic Acids Res*. 2011;39(4):e23.
- 517 29. Li H. Minimap2: pairwise alignment for nucleotide sequences. *Bioinformatics*.  
518 2018;34(18):3094-100.
- 519 30. GenomeSync. <http://genomesync.org>
- 520 31. Federhen S. The NCBI Taxonomy database. *Nucleic Acids Res*.  
521 2012;40(Database issue):D136-43.
- 522 32. Caporaso JG, Kuczynski J, Stombaugh J, Bittinger K, Bushman FD, Costello

- 523 EK, et al. QIIME allows analysis of high-throughput community sequencing  
524 data. *Nat Methods*. 2010;7(5):335-6.
- 525 33. Bolyen E, Rideout JR, Dillon MR, Bokulich NA, Abnet CC, Al-Ghalith GA, et  
526 al. Reproducible, interactive, scalable and extensible microbiome data science  
527 using QIIME 2. *Nat Biotechnol*. 2019;37(8):852-7.
- 528 34. Milani C, Lugli GA, Duranti S, Turrone F, Bottacini F, Mangifesta M, et al.  
529 Genomic encyclopedia of type strains of the genus *Bifidobacterium*. *Appl*  
530 *Environ Microbiol*. 2014;80(20):6290-302.
- 531 35. Human Microbiome Project C. A framework for human microbiome research.  
532 *Nature*. 2012;486(7402):215-21.
- 533 36. Srinivasan R, Karaoz U, Volegova M, MacKichan J, Kato-Maeda M, Miller S, et  
534 al. Use of 16S rRNA gene for identification of a broad range of clinically  
535 relevant bacterial pathogens. *PLoS One*. 2015;10(2):e0117617.
- 536 37. Quick J, Grubaugh ND, Pullan ST, Claro IM, Smith AD, Gangavarapu K, et al.  
537 Multiplex PCR method for MinION and Illumina sequencing of Zika and other  
538 virus genomes directly from clinical samples. *Nat Protoc*. 2017;12(6):1261-76.
- 539 38. Cornelis S, Gansemans Y, Deleye L, Deforce D, Van Nieuwerburgh F. Forensic  
540 SNP Genotyping using Nanopore MinION Sequencing. *Sci Rep*. 2017;7:41759.
- 541 39. Bukin YS, Galachyants YP, Morozov IV, Bukin SV, Zakharenko AS, Zemskaya  
542 TI. The effect of 16S rRNA region choice on bacterial community  
543 metabarcoding results. *Sci Data*. 2019;6:190007.
- 544 40. Ventura M, Turrone F, Motherway MO, MacSharry J, van Sinderen D. Host-  
545 microbe interactions that facilitate gut colonization by commensal  
546 bifidobacteria. *Trends Microbiol*. 2012;20(10):467-76.
- 547 41. Shin J, Lee S, Go MJ, Lee SY, Kim SC, Lee CH, et al. Analysis of the mouse gut  
548 microbiome using full-length 16S rRNA amplicon sequencing. *Sci Rep*.  
549 2016;6:29681.

- 550 42. Magi A, Semeraro R, Mingrino A, Giusti B, D'Aurizio R. Nanopore sequencing  
551 data analysis: state of the art, applications and challenges. *Brief Bioinform.*  
552 2018;19(6):1256-72.
- 553 43. Rang FJ, Kloosterman WP, de Ridder J. From squiggle to basepair:  
554 computational approaches for improving nanopore sequencing read accuracy.  
555 *Genome Biol.* 2018;19(1):90.
- 556  
557



558 **Figure legends**

559 **Fig. 1** Metagenomic analysis of the 16S rRNA gene amplicons using MinION™  
560 nanopore sequencing. **a** Workflow of 16S rRNA amplicon sequencing on the MinION™  
561 platform. Sequencing libraries are generated by the four-primer PCR-based strategy,  
562 enabling simplified post-PCR adapter attachment. At the initial stage of PCR, the 16S  
563 rRNA gene is amplified with the inner primer pairs. The resulting PCR products are  
564 targeted for amplification with the outer primers to introduce the barcode and tag  
565 sequences at both ends, to which adapter molecules can be attached in a single-step  
566 reaction. **b, c** Taxonomic assignments of a mock community analyzed by MinION™  
567 sequencing. The V1-V9 or V3-V4 region of the 16S rRNA gene was amplified from a  
568 pre-characterized mock community sample comprising ten bacterial species and  
569 sequenced on the MinION™ platform. Three thousand reads were randomly selected  
570 from the processed data set and aligned directly to the reference genome database of  
571 5850 representative bacterial species. The pie charts represent taxonomic profiles at the  
572 (b) genus and (c) species levels. Slices corresponding to misclassified (assigned to  
573 bacteria not present in the mock community) or unclassified (not classified at the  
574 species level but placed in a higher taxonomic rank) reads are exploded. The relative  
575 abundance (%) of each taxon is shown.

576

577 **Fig. 2** Accurate taxonomic assignment afforded by full-length MinION™ sequencing of  
578 the 16S rRNA gene. Classification accuracy compared between full-length (V1-V9) and  
579 partial (V3-V4) 16S sequencing data obtained from composition profiling of the ten-  
580 species mock community. The donut charts show the proportions of reads correctly  
581 assigned to the species constituting the mock community. The percentage of correctly  
582 classified reads is shown in the center hole. NA: not assigned (no reads were classified  
583 in *Escherichia* genus).

584

585 **Fig. 3** Metagenomic analysis of human gut microbiota. Six human fecal samples (F1-  
586 F6) were subjected to full-length 16S rRNA amplicon sequencing via MinION™.  
587 Numbers of detected species are plotted against numbers of reads used for taxonomic  
588 classification.

589

590 **Fig. 4** Comparison of taxonomic profiles of human gut microbiota between sequencing  
591 methodologies. Six fecal samples (F1-F6) were analyzed by sequencing the entire 16S  
592 rRNA gene using MinION™ (N\_V1-V9). For comparison, the V3-V4 region was  
593 sequenced on MinION™ (N\_V3-V4) or MiSeq™ platforms (I\_V1-V9). Randomly  
594 sampled 20000 reads from each data set were allocated to the reference genome  
595 database of 5850 representative bacterial species. A heat map shows the relative genus  
596 abundance (%) of classified reads. The 15 most abundant taxa are shown. The Pearson  
597 correlation coefficient ( $r$ ) between sequencing methods was computed. Asterisks  
598 indicate significant correlations at  $P < 0.05$ .

599

600 **Fig. 5** Comparison of taxonomic resolution. The percentages of ambiguous reads not  
601 assigned to the species level are plotted for six fecal samples analyzed by MinION™  
602 (N\_V1-V9 and N\_V3-V4) or MiSeq™ (I\_V3-V4). Horizontal bars represent mean  
603 values. \*  $P < 0.05$  (statistically significant).

604

605 **Fig. 6** Species composition of *Bifidobacterium* in six fecal samples. MinION™ V1-V9  
606 sequencing confers species-level resolution for bacterial composition profiling. Results  
607 obtained by the three sequencing methods are shown. The legends show the 14 most  
608 abundant *Bifidobacterium* species.

**Table 1** MinION™ sequencing statistics for the mock community sample

| Primers | Pass reads   |          |          | Trimmed reads |              | Filtered reads |                  |          |
|---------|--------------|----------|----------|---------------|--------------|----------------|------------------|----------|
|         | No. of reads | Min (bp) | Avg (bp) | Max (bp)      | No. of reads | Avg (bp)       | No. of reads     | Avg (bp) |
| V1-V9   | 8651         | 237      | 1497     | 3292          | 8455         | 1367.1         | 6972<br>(80.6%)  | 1473     |
| V3-V4   | 101372       | 180      | 585.7    | 1977          | 99937        | 451.8          | 96189<br>(94.9%) | 454.9    |

Min: minimum read length, Avg: average read length, Max: maximum read length

**Table 2** Statistics of MinION™ sequencing data for human fecal samples

| Sample     | Pass reads   |          |          | Trimmed reads |              | Filtered reads |                           |          |
|------------|--------------|----------|----------|---------------|--------------|----------------|---------------------------|----------|
|            | No. of reads | Min (bp) | Avg (bp) | Max (bp)      | No. of reads | Avg (bp)       | No. of reads (percentage) | Avg (bp) |
| F1/N_V1-V9 | 104895       | 186      | 1521.1   | 4549          | 103100       | 1386.4         | 89752 (85.6%)             | 1463.7   |
| F2/N_V1-V9 | 84065        | 169      | 1393.8   | 4253          | 82458        | 1259.8         | 60326 (71.8%)             | 1461.4   |
| F3/N_V1-V9 | 76968        | 168      | 1474.3   | 4829          | 74479        | 1343.3         | 60,713 (78.9%)            | 1465.5   |
| F4/N_V1-V9 | 114060       | 168      | 1541.7   | 4836          | 111436       | 1410.6         | 100569 (88.2%)            | 1469.9   |
| F5/N_V1-V9 | 85912        | 177      | 1536.0   | 4877          | 83038        | 1405.4         | 74168 (86.3%)             | 1474.2   |
| F6/N_V1-V9 | 108938       | 213      | 1525.1   | 4866          | 106857       | 1393.5         | 93146 (85.5%)             | 1467.4   |
| F1/N_V3-V4 | 52864        | 160      | 568.8    | 2759          | 52283        | 435.2          | 48494 (91.7%)             | 442.5    |
| F2/N_V3-V4 | 92816        | 174      | 583.4    | 2886          | 91989        | 442.8          | 89016 (95.9%)             | 444.7    |
| F3/N_V3-V4 | 60200        | 163      | 568.5    | 2062          | 59435        | 434.6          | 55706 (92.5%)             | 441.1    |
| F4/N_V3-V4 | 83021        | 202      | 578.0    | 2050          | 81734        | 446.1          | 77995 (93.9%)             | 450.0    |
| F5/N_V3-V4 | 78409        | 167      | 578.4    | 1796          | 76135        | 447.8          | 72526 (92.5%)             | 453.1    |
| F6/N_V3-V4 | 74931        | 114      | 580.3    | 2246          | 73946        | 446.1          | 71330 (95.2%)             | 449.1    |

N: Oxford Nanopore MinION™, Min: minimum read length, Avg: average read length, Max: maximum read length

**Table 3** Statistics of MiSeq™ sequencing data for human fecal samples

| Sample     | Paired reads | Merged reads |          | Filtered reads    |          |
|------------|--------------|--------------|----------|-------------------|----------|
|            | No. of reads | No. of reads | Avg (bp) | No. of reads      | Avg (bp) |
| F1/I_V3-V4 | 66242        | 63821        | 449.3    | 63778<br>(96.3%)  | 449.5    |
| F2/I_V3-V4 | 68824        | 66640        | 447.6    | 66490<br>(96.6%)  | 448.3    |
| F3/I_V3-V4 | 132057       | 128095       | 446.9    | 127999<br>(96.9%) | 447.1    |
| F4/I_V3-V4 | 103532       | 100945       | 451.4    | 100853<br>(97.4%) | 451.7    |
| F5/I_V3-V4 | 72136        | 70521        | 451      | 70459<br>(97.7%)  | 451.3    |
| F6/I_V3-V4 | 52182        | 50907        | 449      | 50841<br>(97.4%)  | 449.5    |

I: Illumina MiSeq™, Avg: average read length

Fig. 1

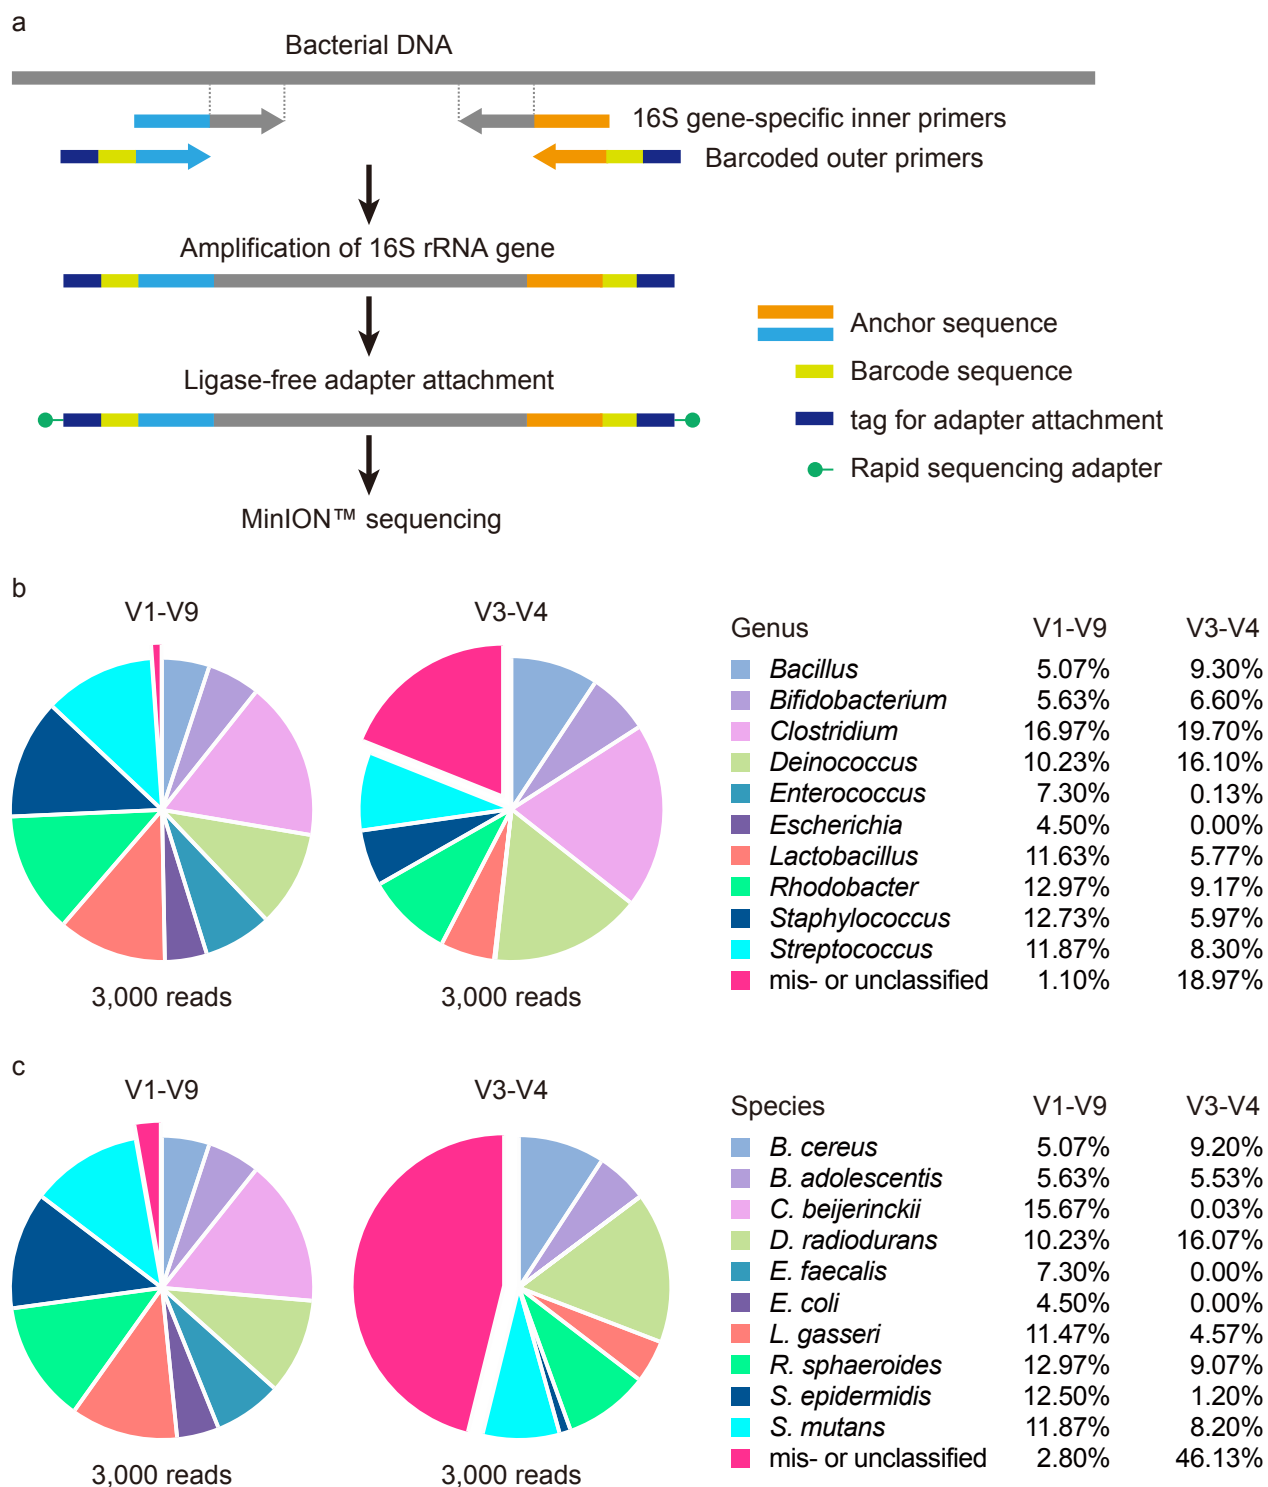

Fig. 2

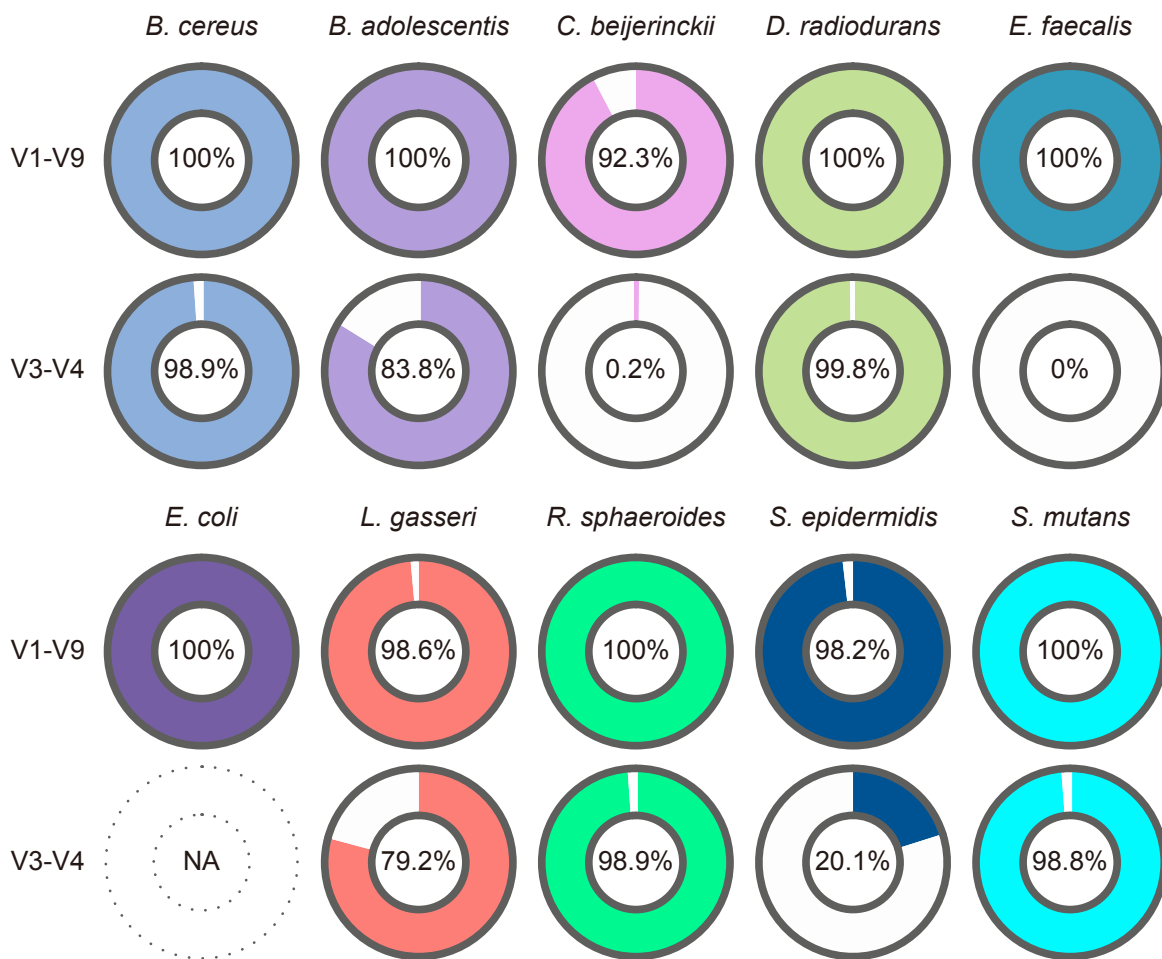

Fig. 3

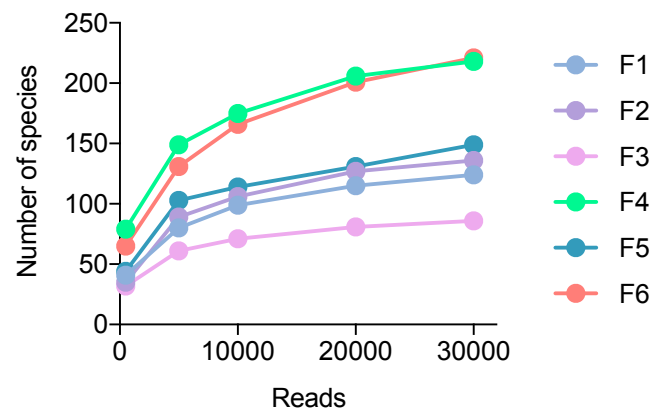



Fig. 4

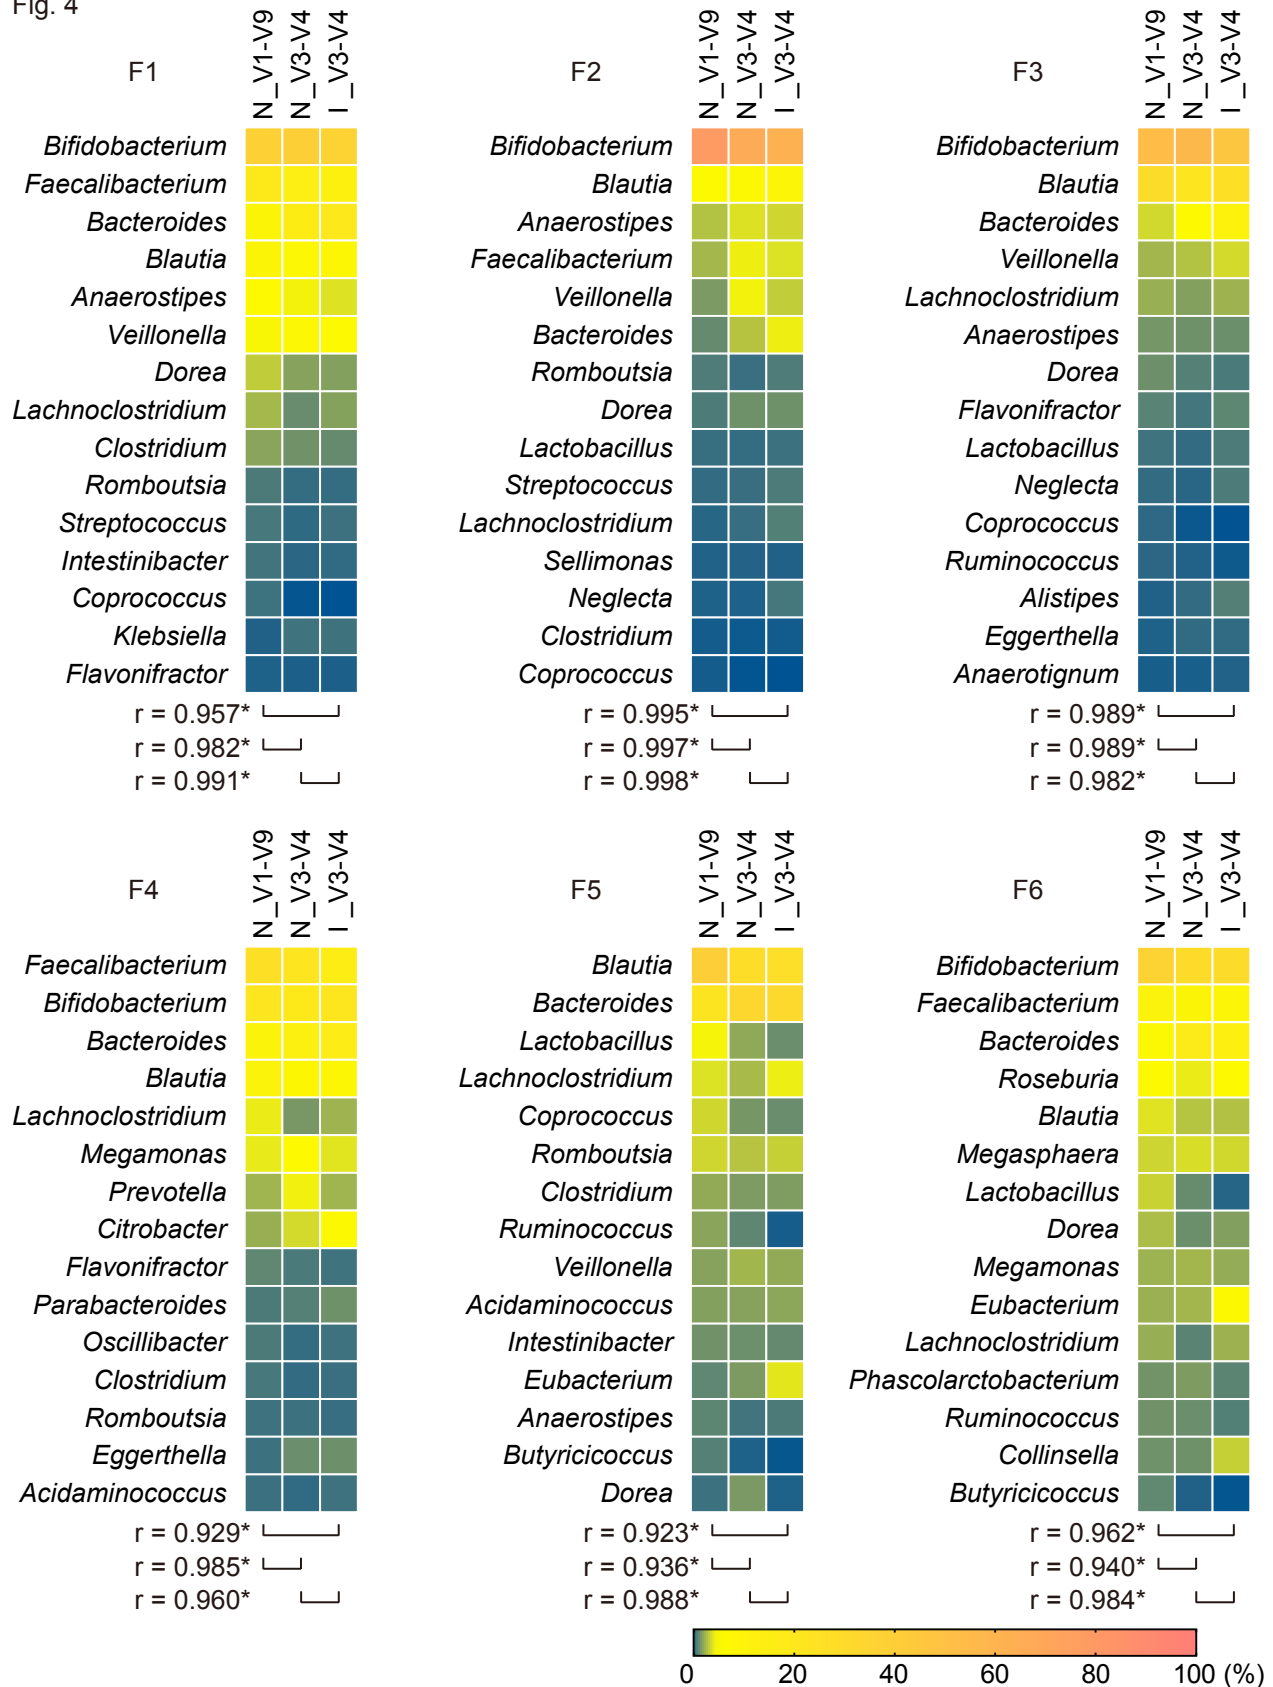

Fig. 5

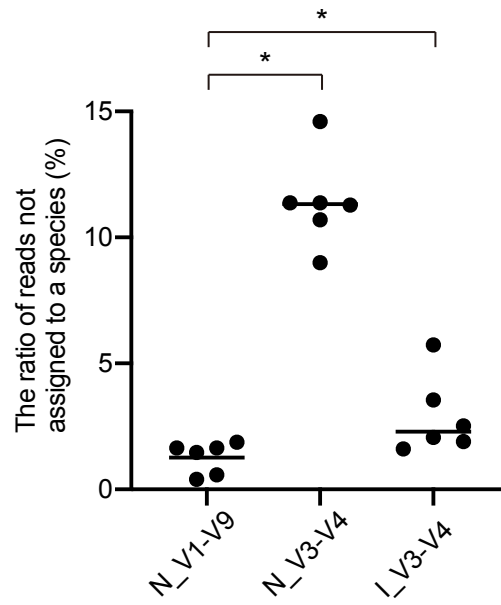

Fig. 6

a

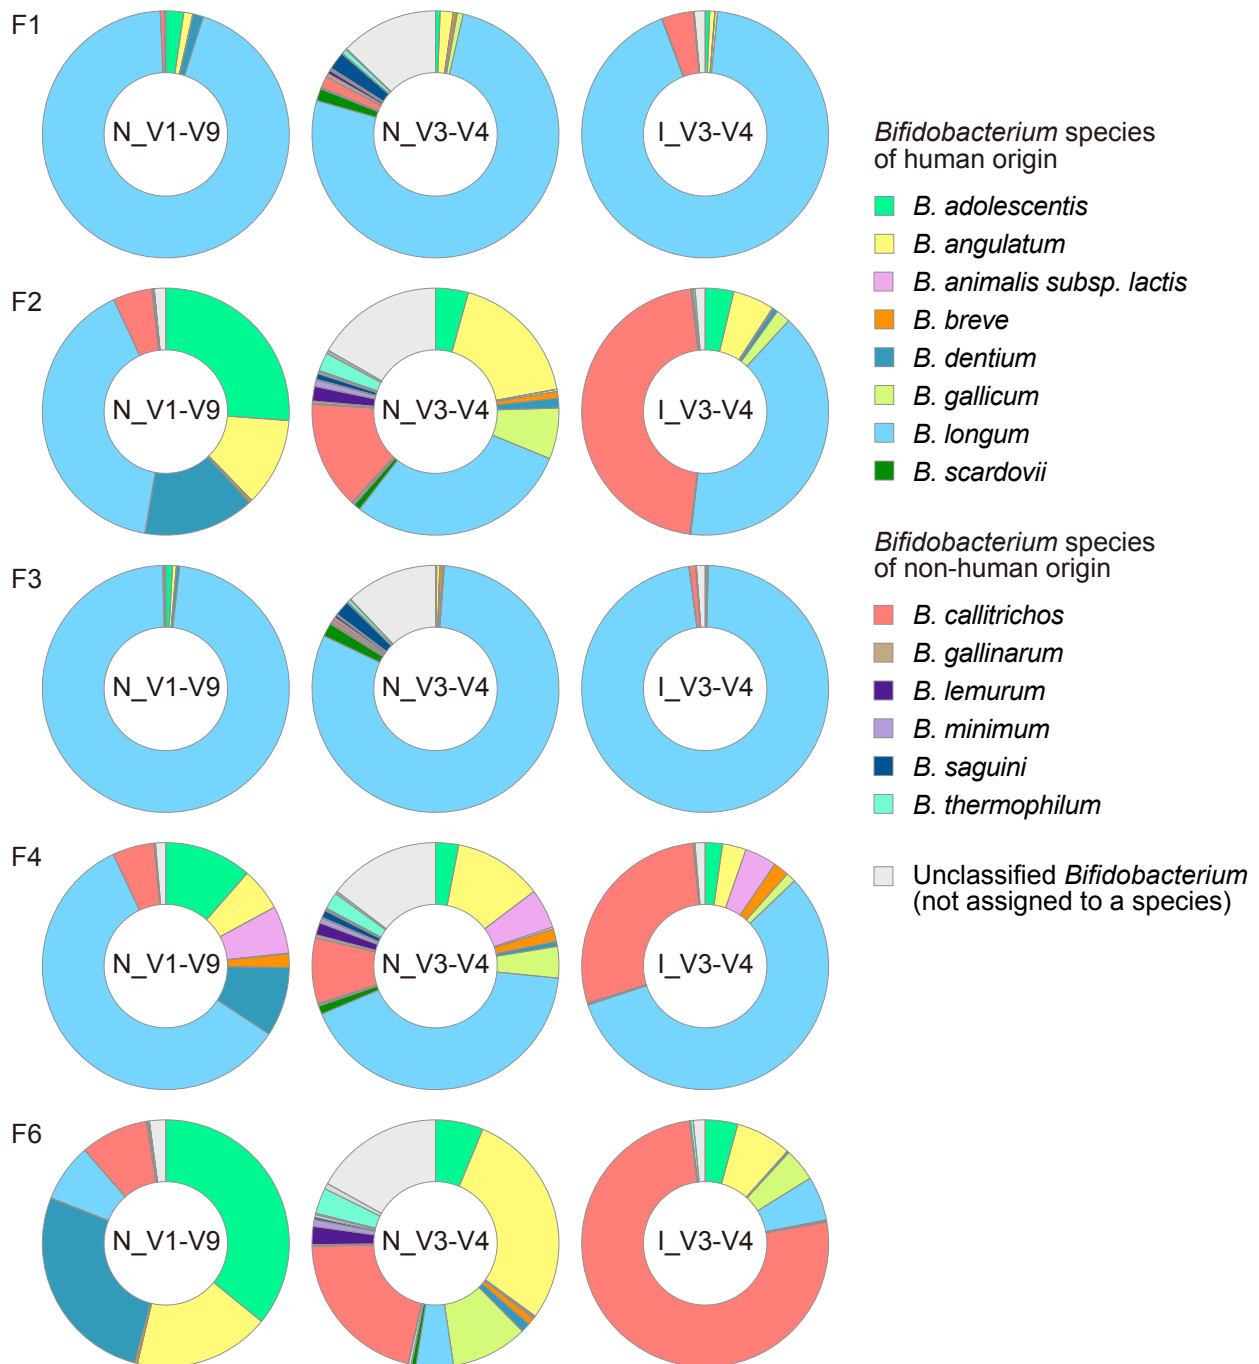

Source: https://biorxiv.org/content/10.1101/2020.05.06.078147v1.full.pdf
